# Supplementary figures and images for: Assessment of epigenetic mechanisms and DNA double-strand break repair using laser micro-irradiation technique developed for hematological cells
Source: PubMed Central journal article supplement — eBioMedicine. 2019 Apr 16;43:138–49. doi: 10.1016/j.ebiom.2019.03.083 (PMC6562062; doi:10.1016/j.ebiom.2019.03.083), 2019-04-16

# Supplementary Figure 1

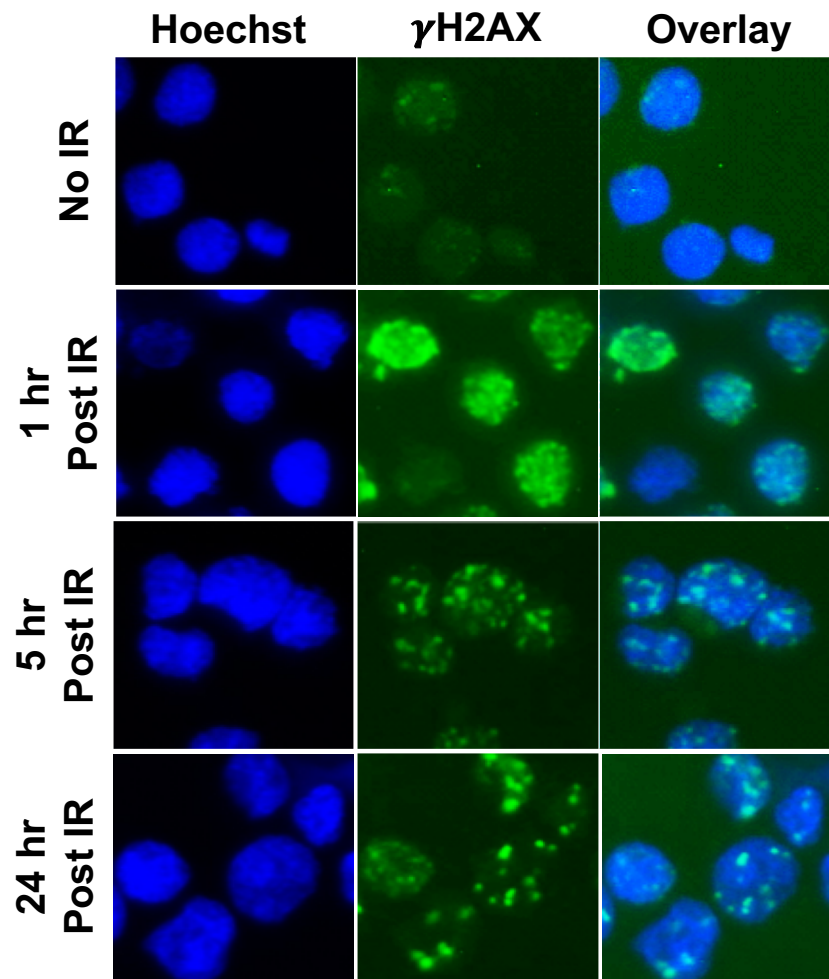

# Supplementary Figure 2

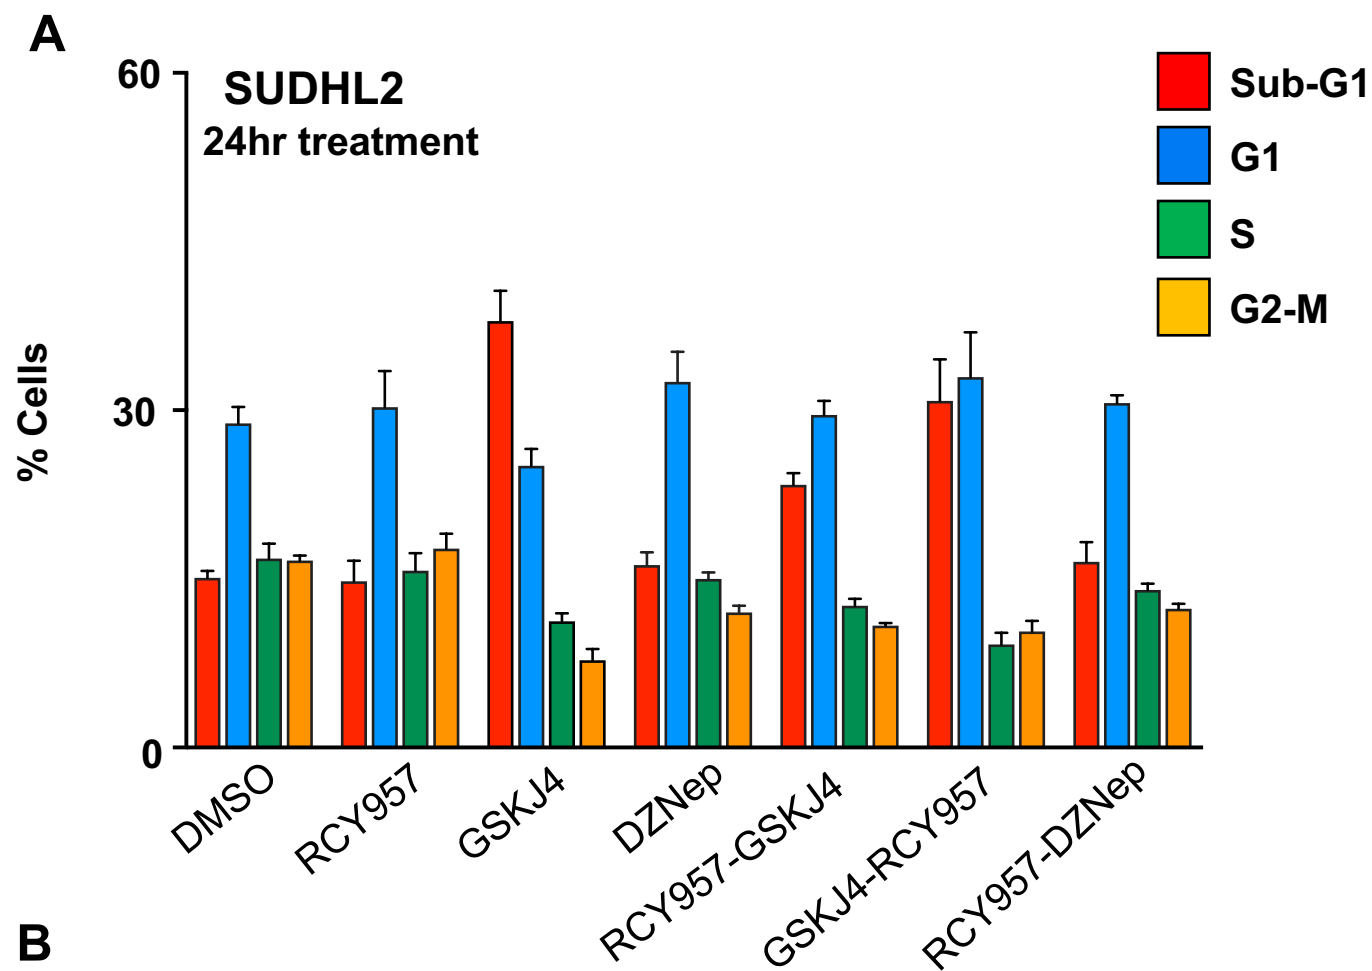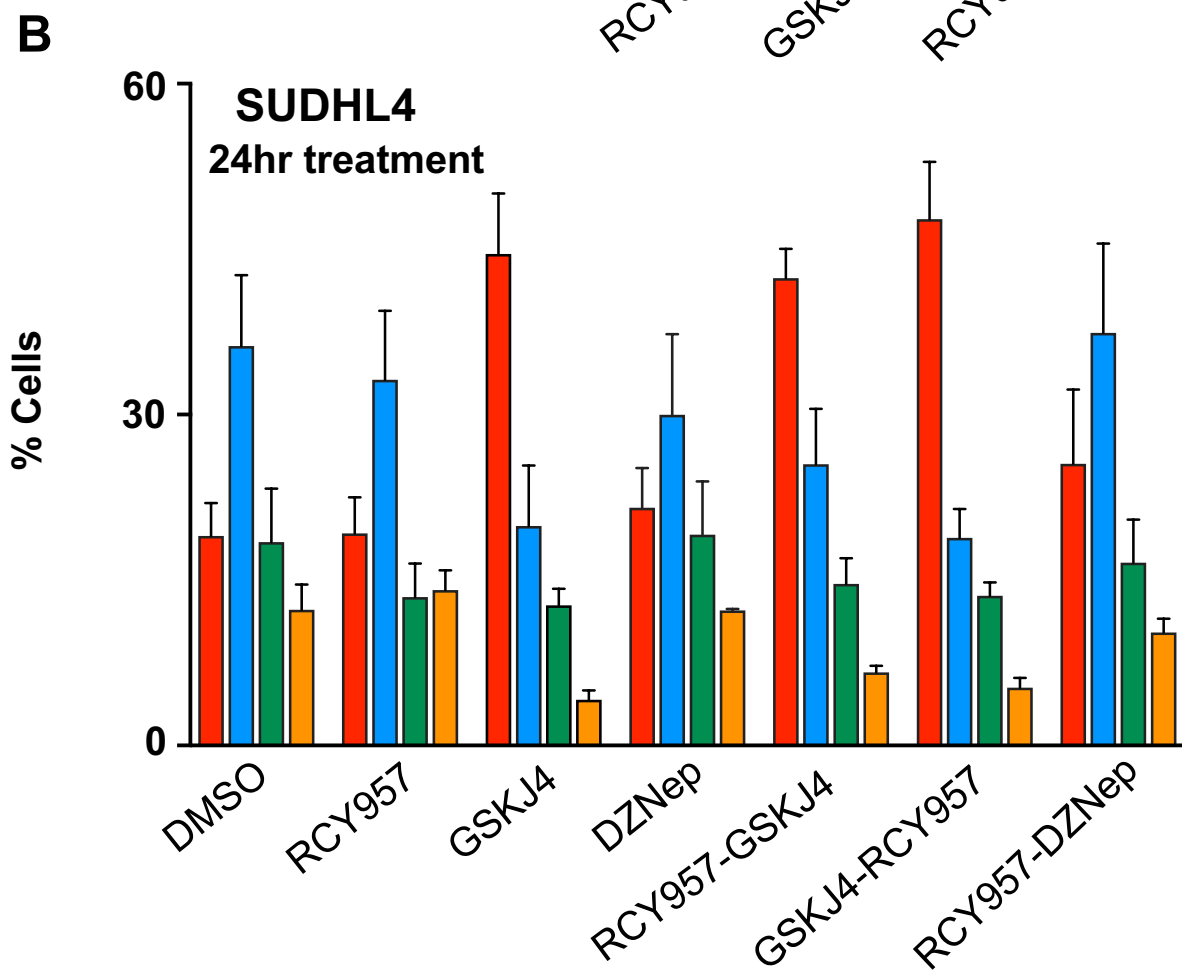

# Supplementary Figure 3

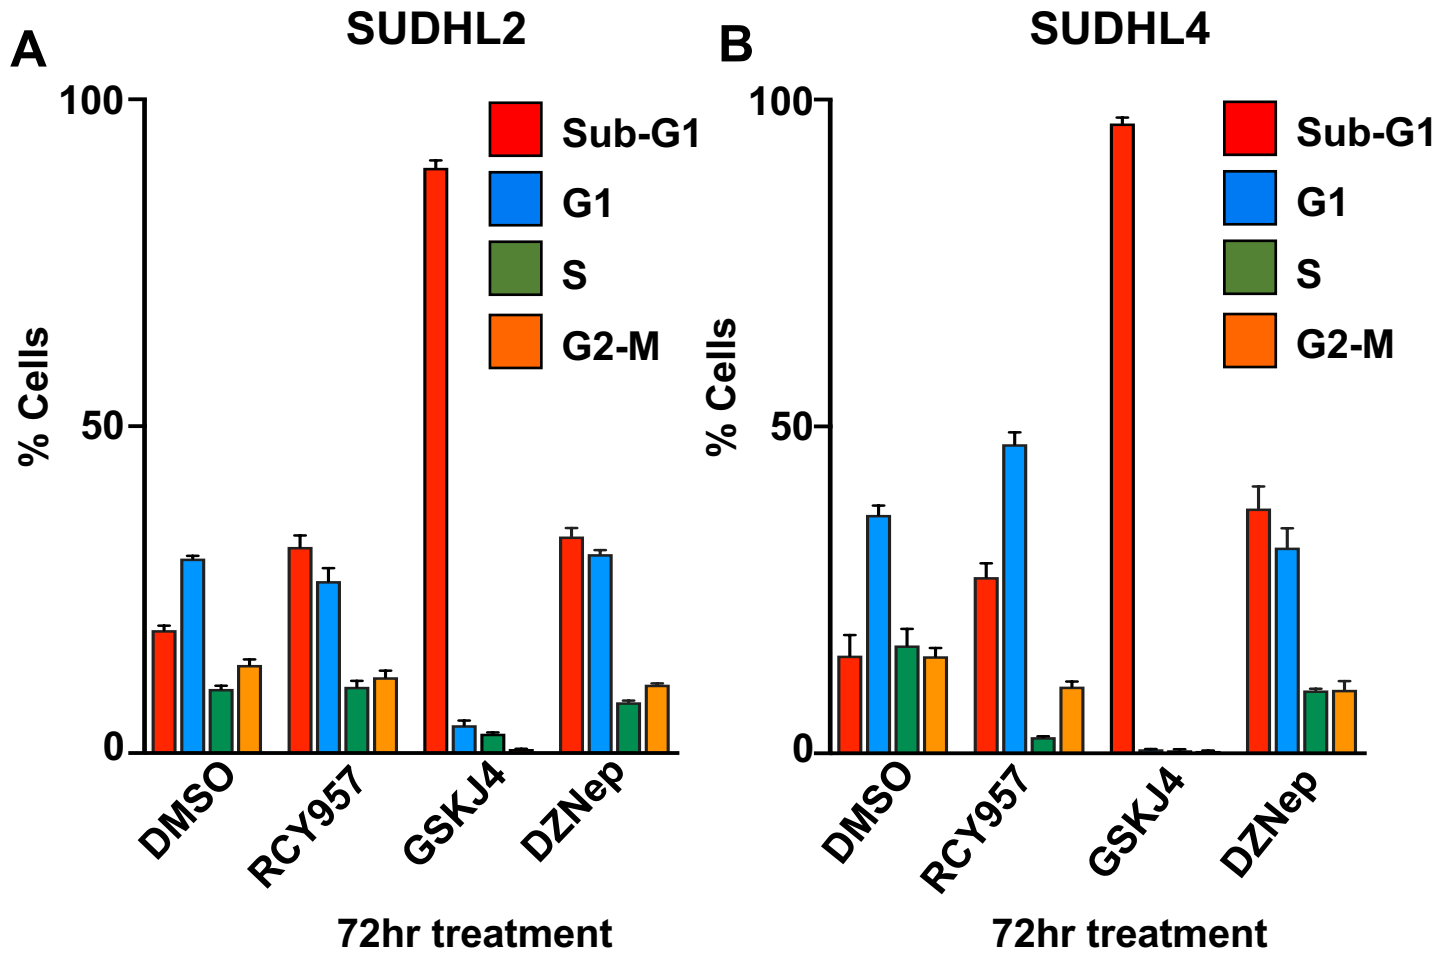

# Supplementary Figure 4

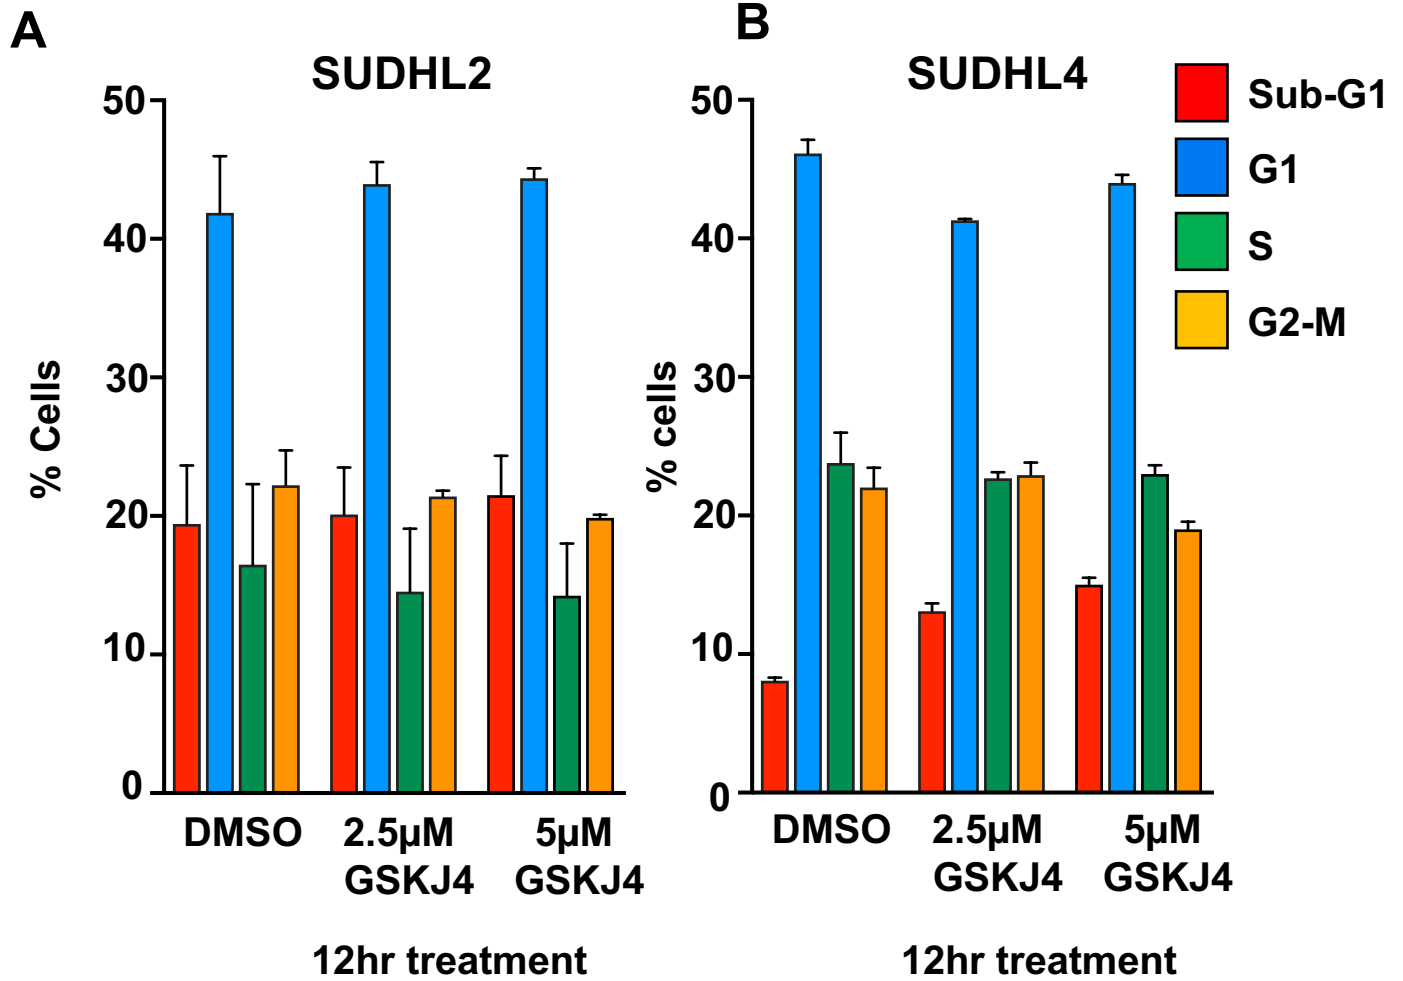

Supplement: mmc1.pdf [file mmc1.pdf]
